# Supplementary material for: Total synthesis of five natural eremophilane-type sesquiterpenoids
Source: Royal Society of Chemistry journal article supplement (doi:10.1039/c7ob02769a), 2018-01-01
Supplement: c7ob02769a1.pdf [file c7ob02769a1.pdf]

Electronic Supplementary Material (ESI) for Organic & Biomolecular Chemistry.  
This journal is © The Royal Society of Chemistry 2016

# Supporting Information

## Total Syntheses of Five Natural Eremophilane-type Sesquiterpenoids

*Zhe Meng and Bo Liu* \*

## Table of Contents

|                                                                                                                      |            |
|----------------------------------------------------------------------------------------------------------------------|------------|
| <b>Tables S1, S2, S3, S4, S5, S6, S7, S8, S9 and S10 (NMR comparison between synthetic and natural samples).....</b> | <b>S3</b>  |
| <b>NMR Spectra for Selected Compounds.....</b>                                                                       | <b>S13</b> |
| <b>X-Ray Crystallographic Data for compound (<math>\pm</math>)-A, C and E.....</b>                                   | <b>S26</b> |

**Table S1 Comparison of <sup>1</sup>H NMR data between natural A with those of synthetic A**

| Position | Natural (400 MHz, CDCl <sub>3</sub> ) | Synthetic (400 MHz, CDCl <sub>3</sub> ) | Δδ(ppm) |
|----------|---------------------------------------|-----------------------------------------|---------|
| 1a       | 2.02, m                               | 2.41, m                                 | --      |
| 1b       | 1.82, m                               | --                                      | --      |
| 2a       | 1.63, m                               | 1.99, m                                 | --      |
| 2b       | 1.46, m                               | --                                      | --      |
| 3a       | 1.33, m                               | 1.41, m                                 | --      |
| 3b       | 1.02, m                               | --                                      | --      |
| 4        | 1.53, m                               | 1.54, m                                 | +0.01   |
| 5        | --                                    | --                                      | --      |
| 6        | 6.33, s                               | 6.32, s                                 | -0.01   |
| 7        | --                                    | --                                      | --      |
| 8        | --                                    | --                                      | --      |
| 9        | 6.19, s                               | 6.17, s                                 | -0.02   |
| 10       | --                                    | --                                      | --      |
| 11       | 1.15, s                               | 1.13, s                                 | -0.02   |
| 12       | 1.08, d (5.2)                         | 1.06, d (6.2)                           | -0.02   |
| OH       | 7.27, s                               | 6.36, s                                 | --      |

Δδ= the chemical shift of synthetic sample minus the chemical shift of natural sample.

From table S1, we can see inconsistency among three pairs of chemical shifts for hydrogens at C1, C2 and C3. Almost all of these chemical shifts are shifted to the downfield. In fact, the chemical shifts of hydrogens at C1, C2 and C3 in our synthetic compound A are δ2.41(2H, m), δ1.99(1H, m) and δ1.41(3H, m) respectively.

According to the single-crystal structure of compound A, intermolecular hydrogen

bonds were formed between the two isomers. Guessing it was the reason that resulted in the great difference between natural **A** and the synthetic one.

**Table S2 Comparison of  $^{13}\text{C}$  NMR data between natural **A** with those of synthetic **A****

| Position | Natural (100 MHz, $\text{CDCl}_3$ ) | Synthetic (100 MHz, $\text{CDCl}_3$ ) | $\Delta\delta(\text{ppm})$ |
|----------|-------------------------------------|---------------------------------------|----------------------------|
| 1        | 33.4                                | 33.3                                  | -0.1                       |
| 2        | 28.5                                | 28.4                                  | -0.1                       |
| 3        | 30.2                                | 30.1                                  | -0.1                       |
| 4        | 44.6                                | 44.5                                  | -0.1                       |
| 5        | 43.1                                | 43.1                                  | 0.0                        |
| 6        | 124.6                               | 124.5                                 | -0.1                       |
| 7        | 146.4                               | 146.3                                 | -0.1                       |
| 8        | 182.1                               | 182.0                                 | -0.1                       |
| 9        | 121.5                               | 121.4                                 | -0.1                       |
| 10       | 173.2                               | 173.1                                 | -0.1                       |
| 11       | 18.3                                | 18.2                                  | -0.1                       |
| 12       | 16.7                                | 16.6                                  | -0.1                       |

$\Delta\delta$ = the chemical shift of synthetic sample minus the chemical shift of natural sample.

**Table S3 Comparison of <sup>1</sup>H NMR data between natural B with those of synthetic B**

| Position | Natural (400 MHz, CDCl <sub>3</sub> ) | Synthetic (400 MHz, CDCl <sub>3</sub> ) | Δδ(ppm) |
|----------|---------------------------------------|-----------------------------------------|---------|
| 1        | 2.38, m                               | 2.38, m                                 | 0.00    |
| 2a       | 1.99, m                               | 1.99, m                                 | 0.00    |
| 2b       | 1.39, m                               | 1.39, m                                 | 0.00    |
| 3        | 1.56, m                               | 1.56, m                                 | 0.00    |
| 4        | 1.52, m                               | 1.52, m                                 | 0.00    |
| 5        | --                                    | --                                      | --      |
| 6        | 7.02, s                               | 7.02, s                                 | 0.00    |
| 7        | --                                    | --                                      | --      |
| 8        | --                                    | --                                      | --      |
| 9        | 6.09, s                               | 6.08, s                                 | -0.01   |
| 10       | --                                    | --                                      | --      |
| 11       | --                                    | --                                      | --      |
| 12       | 4.19, s                               | 4.16, s                                 | -0.03   |
| 13a      | 5.22, d (1.7)                         | 5.21, d (1.6)                           | -0.01   |
| 13b      | 5.28, d (1.7)                         | 5.28, s                                 | 0.00    |
| 14       | 1.15, s                               | 1.14, s                                 | -0.01   |
| 15       | 1.07, d (6.1)                         | 1.06, d (5.9)                           | -0.01   |

Δδ= the chemical shift of synthetic sample minus the chemical shift of natural sample.

**Table S4 Comparison of  $^{13}\text{C}$  NMR data between natural B with those of synthetic B**

| Position | Natural (100 MHz, $\text{CDCl}_3$ ) | Synthetic (100 MHz, $\text{CDCl}_3$ ) | $\Delta\delta(\text{ppm})$ |
|----------|-------------------------------------|---------------------------------------|----------------------------|
| 1        | 33.0                                | 32.8                                  | -0.2                       |
| 2        | 28.0                                | 28.1                                  | +0.1                       |
| 3        | 30.2                                | 30.2                                  | 0.0                        |
| 4        | 41.8                                | 41.8                                  | 0.0                        |
| 5        | 44.1                                | 44.2                                  | +0.1                       |
| 6        | 154.2                               | 154.4                                 | +0.2                       |
| 7        | 146.9                               | 146.8                                 | -0.1                       |
| 8        | 186.8                               | 186.9                                 | +0.1                       |
| 9        | 124.1                               | 124.2                                 | +0.1                       |
| 10       | 169.5                               | 169.7                                 | +0.2                       |
| 11       | 138.6                               | 138.5                                 | -0.1                       |
| 12       | 65.3                                | 65.1                                  | -0.2                       |
| 13       | 117.8                               | 117.7                                 | -0.1                       |
| 14       | 17.2                                | 17.2                                  | 0.0                        |
| 15       | 16.3                                | 16.3                                  | 0.0                        |

$\Delta\delta$ = the chemical shift of synthetic sample minus the chemical shift of natural sample.

**Table S5 Comparison of <sup>1</sup>H NMR data between natural C with those of synthetic C**

| Position | Natural (400 MHz, CDCl <sub>3</sub> ) | Synthetic (400 MHz, CDCl <sub>3</sub> ) | Δδ(ppm) |
|----------|---------------------------------------|-----------------------------------------|---------|
| 1        | 4.59, br s                            | 4.57, br s                              | -0.02   |
| 2a       | 2.05-2.32, m                          | 2.07-2.12, m                            | 0.00    |
| 2b       | 1.60-1.70, m                          | 1.57-1.69, m                            | 0.00    |
| 3a       | 1.80-1.90, m                          | 1.85-1.96, m                            | 0.00    |
| 3b       | 1.40-1.50, m                          | 1.43-1.53, m                            | 0.00    |
| 5        | --                                    | --                                      | --      |
| 6        | 6.33, s                               | 6.34, s                                 | +0.01   |
| 7        | --                                    | --                                      | --      |
| 8        | --                                    | --                                      | --      |
| 9        | 6.28, s                               | 6.26, s                                 | -0.02   |
| 10       | --                                    | --                                      | --      |
| 14       | 1.38, s                               | 1.37, s                                 | -0.01   |
| 15       | 1.10, d (6.3)                         | 1.11, d (6.6)                           | +0.01   |
| OH       | 6.20, s                               | --                                      | --      |

Δδ= the chemical shift of synthetic sample minus the chemical shift of natural sample.

**Table S6 Comparison of  $^{13}\text{C}$  NMR data between natural C with those of synthetic C**

| Position | Natural (100 MHz, $\text{CDCl}_3$ ) | Synthetic (100 MHz, $\text{CDCl}_3$ ) | $\Delta\delta$ (ppm) |
|----------|-------------------------------------|---------------------------------------|----------------------|
| 1        | 74.2                                | 74.0                                  | -0.2                 |
| 2        | 35.0                                | 34.9                                  | -0.1                 |
| 3        | 25.0                                | 24.9                                  | -0.1                 |
| 4        | 43.0                                | 42.9                                  | -0.1                 |
| 5        | 44.7                                | 44.7                                  | 0.0                  |
| 6        | 126.7                               | 126.8                                 | +0.1                 |
| 7        | 146.0                               | 146.0                                 | 0.0                  |
| 8        | 182.4                               | 182.4                                 | 0.0                  |
| 9        | 123.7                               | 123.6                                 | -0.1                 |
| 10       | 169.4                               | 169.5                                 | +0.1                 |
| 14       | 19.6                                | 19.5                                  | -0.1                 |
| 15       | 16.7                                | 16.5                                  | -0.2                 |

$\Delta\delta$ = the chemical shift of synthetic sample minus the chemical shift of natural sample.



**Table S7 Comparison of <sup>1</sup>H NMR data between natural D with those of synthetic D**

| Position | Natural (400 MHz, CDCl <sub>3</sub> ) | Synthetic (400 MHz, CDCl <sub>3</sub> ) | Δδ(ppm) |
|----------|---------------------------------------|-----------------------------------------|---------|
| 1        | 5.50, t (3.0)                         | 5.48, t (2.5)                           | -0.02   |
| 2a       | 2.13, m                               | 2.09, m                                 | -0.04   |
| 2b       | 1.86, dddd (14.0,4.0,4.0,3.0)         | 1.85, m                                 | -0.01   |
| 3a       | 1.49, m                               | --                                      | --      |
| 3b       | 1.62, m                               | 1.54-1.70, m, 3H                        | --      |
| 4        | 1.71, m                               | --                                      | --      |
| 5        | --                                    | --                                      | --      |
| 6        | 7.67, s                               | 7.65, s                                 | -0.02   |
| 7        | --                                    | --                                      | --      |
| 8        | --                                    | --                                      | --      |
| 9        | 6.31, s                               | 6.34, s                                 | +0.03   |
| 10       | --                                    | --                                      | --      |
| 11       | --                                    | --                                      | --      |
| 12       | --                                    | --                                      | --      |
| 13       | 2.56, s                               | 2.54, s                                 | -0.02   |
| 14       | 1.29, s                               | 1.28, s                                 | -0.01   |
| 15       | 1.15, d (6.6)                         | 1.14, d (6.6)                           | -0.01   |
| OAc      | 2.06, s                               | 2.04, s                                 | -0.02   |

Δδ= the chemical shift of synthetic sample minus the chemical shift of natural sample.

**Table S8 Comparison of  $^{13}\text{C}$  NMR data between natural D with those of synthetic D**

| Position | Natural (100 MHz, $\text{CDCl}_3$ ) | Synthetic (100 MHz, $\text{CDCl}_3$ ) | $\Delta\delta(\text{ppm})$ |
|----------|-------------------------------------|---------------------------------------|----------------------------|
| 1        | 74.3                                | 74.4                                  | +0.1                       |
| 2        | 32.1                                | 32.0                                  | -0.1                       |
| 3        | 21.5                                | 25.5                                  | +4.0                       |
| 4        | 41.1                                | 40.7                                  | -0.4                       |
| 5        | 43.8                                | 43.9                                  | +0.1                       |
| 6        | 160.7                               | 161.0                                 | +0.3                       |
| 7        | 135.8                               | 136.2                                 | +0.4                       |
| 8        | 185.3                               | 184.0                                 | -1.3                       |
| 9        | 128.8                               | 129.4                                 | +0.6                       |
| 10       | 159.4                               | 159.6                                 | +0.2                       |
| 11       | 198.5                               | 198.7                                 | +0.2                       |
| 12       | --                                  | --                                    | --                         |
| 13       | 30.9                                | 31.1                                  | +0.2                       |
| 14       | 18.1                                | 17.9                                  | -0.2                       |
| 15       | 16.1                                | 16.1                                  | 0.0                        |
| OAc      | 169.7                               | 169.9                                 | +0.2                       |
|          | 21.2                                | 21.3                                  | +0.1                       |

$\Delta\delta$ = the chemical shift of synthetic sample minus the chemical shift of natural sample.

**Table S9 Comparison of <sup>1</sup>H NMR data between natural E with those of synthetic E**

| Position | Natural (400 MHz, CDCl <sub>3</sub> ) | Synthetic (400 MHz, CDCl <sub>3</sub> ) | Δδ(ppm) |
|----------|---------------------------------------|-----------------------------------------|---------|
| 1        | 4.56, t (2.8)                         | 4.54, m                                 | -0.02   |
| 2a       | 2.09, dddd (13.5,4.0,4.0,3.2)         | --                                      | --      |
| 2b       | 2.02, dddd (14.0,13.5,13.5,3.2)       | 2.01, m, 2H                             | -0.01   |
| 3a       | 1.52, m                               | --                                      | --      |
| 3b       | 1.61, m                               | 1.49-1.68, m, 3H                        | --      |
| 4        | 1.68, m                               | --                                      | --      |
| 5        | --                                    | --                                      | --      |
| 6        | 7.68, s                               | 7.67, s                                 | -0.01   |
| 7        | --                                    | --                                      | --      |
| 8        | --                                    | --                                      | --      |
| 9        | 6.18, s                               | 6.18, s                                 | 0.00    |
| 10       | --                                    | --                                      | --      |
| 11       | --                                    | --                                      | --      |
| 12       | --                                    | --                                      | --      |
| 13       | 2.56, s                               | 2.55, s                                 | -0.01   |
| 14       | 1.38, s                               | 1.39, s                                 | +0.01   |
| 15       | 1.15, d (6.6)                         | 1.14, d (6.6)                           | -0.01   |

Δδ= the chemical shift of synthetic sample minus the chemical shift of natural sample.

**Table S10 Comparison of  $^{13}\text{C}$  NMR data between natural E with those of synthetic E**

| Position | Natural (100 MHz, $\text{CDCl}_3$ ) | Synthetic (100 MHz, $\text{CDCl}_3$ ) | $\Delta\delta$ (ppm) |
|----------|-------------------------------------|---------------------------------------|----------------------|
| 1        | 73.2                                | 73.5                                  | +0.3                 |
| 2        | 34.3                                | 34.5                                  | +0.2                 |
| 3        | 24.8                                | 25.0                                  | +0.2                 |
| 4        | 40.8                                | 41.0                                  | +0.2                 |
| 5        | 44.1                                | 44.2                                  | +0.1                 |
| 6        | 161.7                               | 161.8                                 | +0.1                 |
| 7        | 135.8                               | 136.1                                 | +0.3                 |
| 8        | 184.3                               | 184.5                                 | +0.2                 |
| 9        | 126.8                               | 127.0                                 | +0.2                 |
| 10       | 165.2                               | 165.0                                 | -0.2                 |
| 11       | 198.6                               | 198.8                                 | +0.2                 |
| 12       | --                                  | --                                    | --                   |
| 13       | 30.9                                | 31.1                                  | +0.2                 |
| 14       | 18.6                                | 18.8                                  | +0.2                 |
| 15       | 16.0                                | 16.1                                  | +0.1                 |

$\Delta\delta$ = the chemical shift of synthetic sample minus the chemical shift of natural sample.

$^1\text{H}$  and  $^{13}\text{C}$  NMR spectra of compound **3**

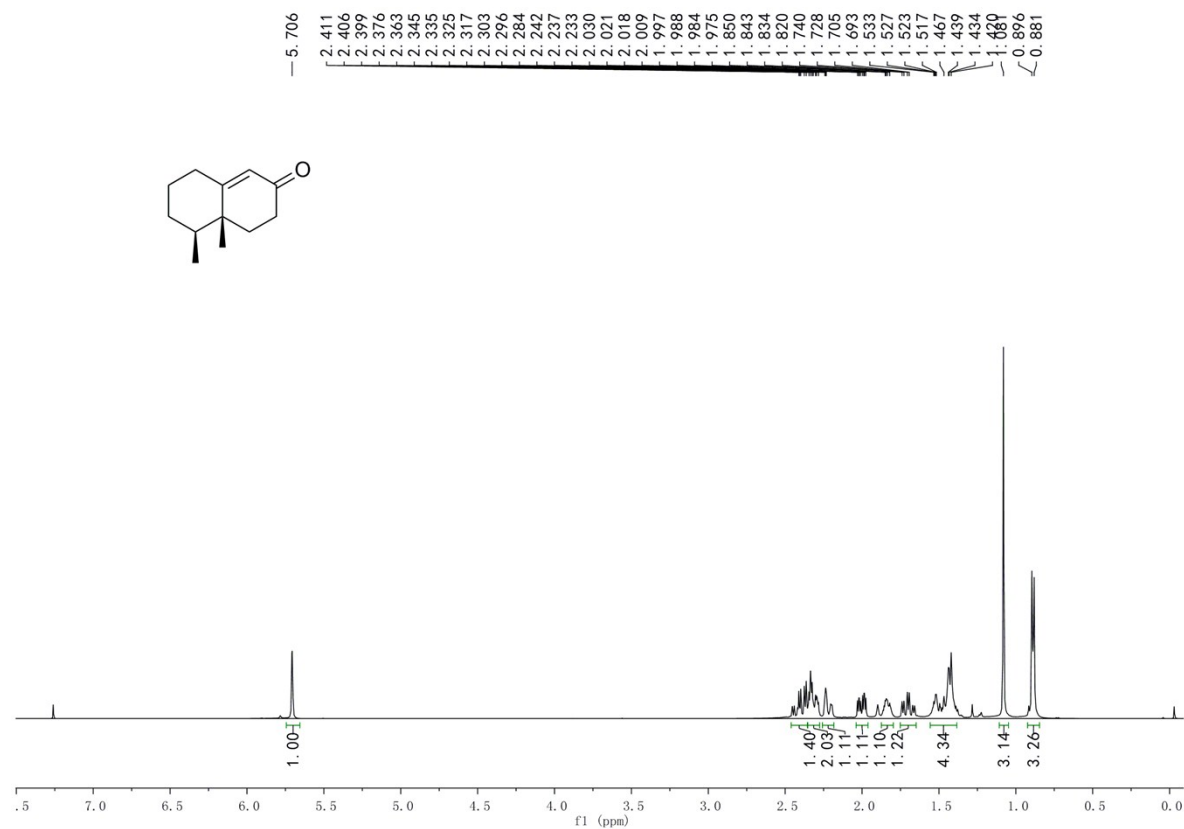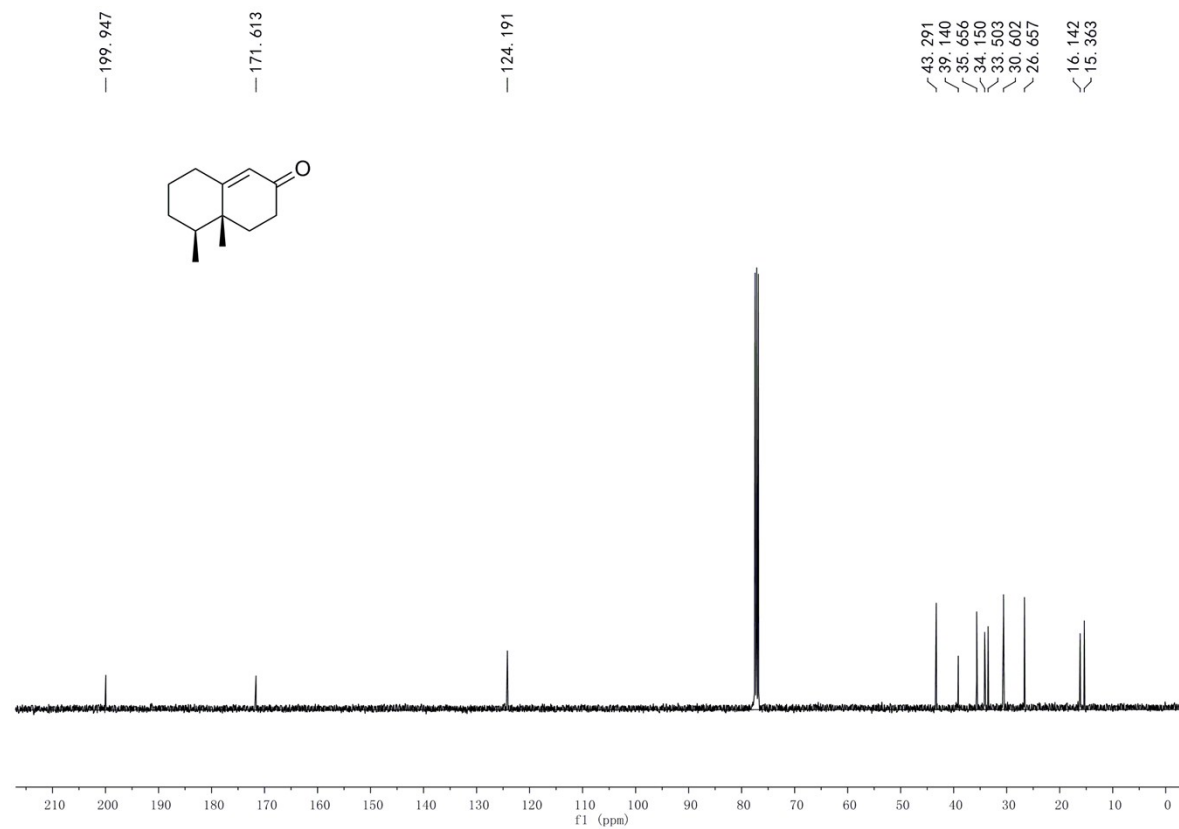

$^1\text{H}$  and  $^{13}\text{C}$  NMR spectra of compound A

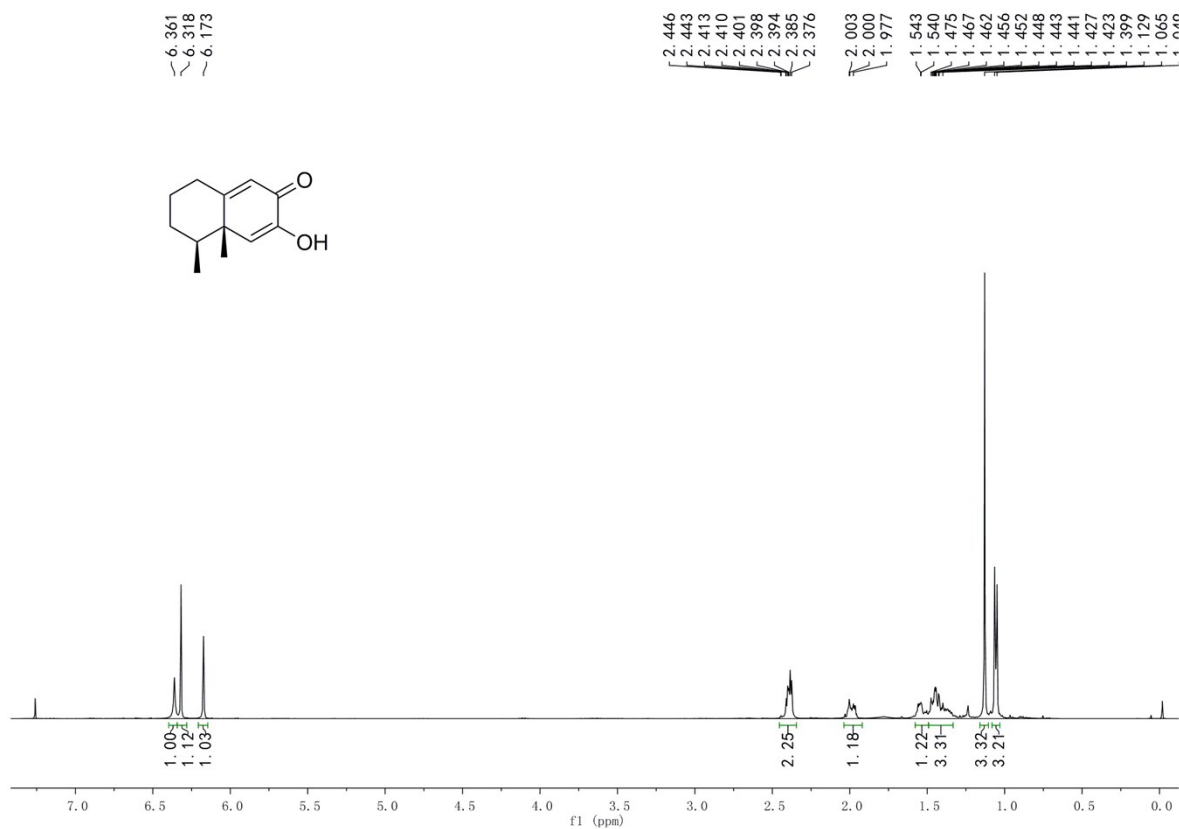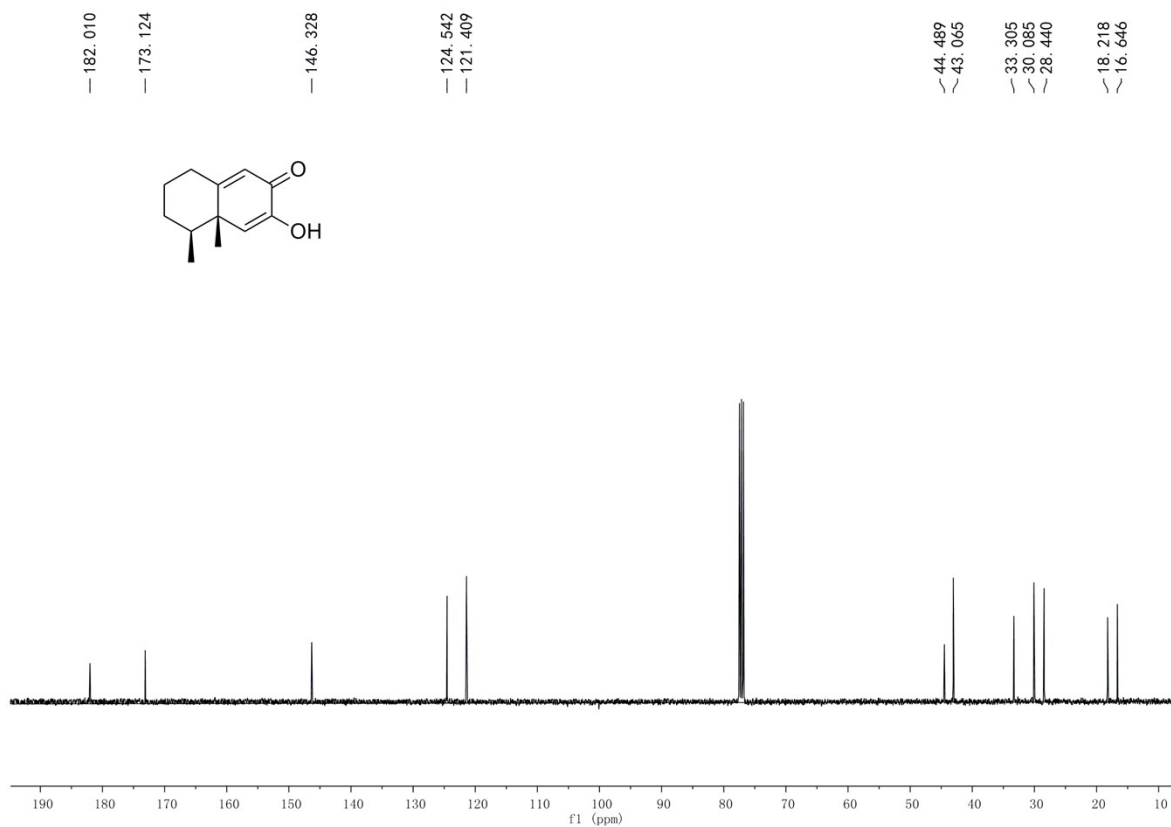

$^1\text{H}$  and  $^{13}\text{C}$  NMR spectra of compound **1**

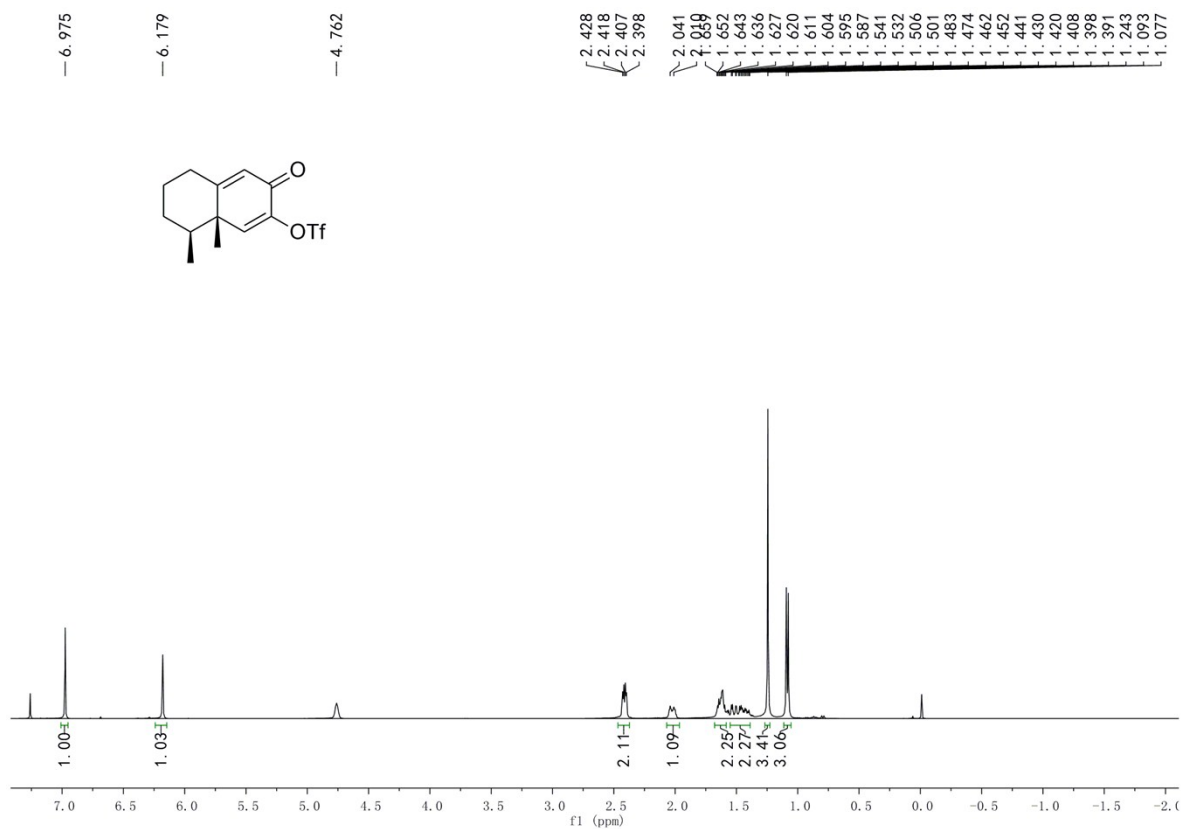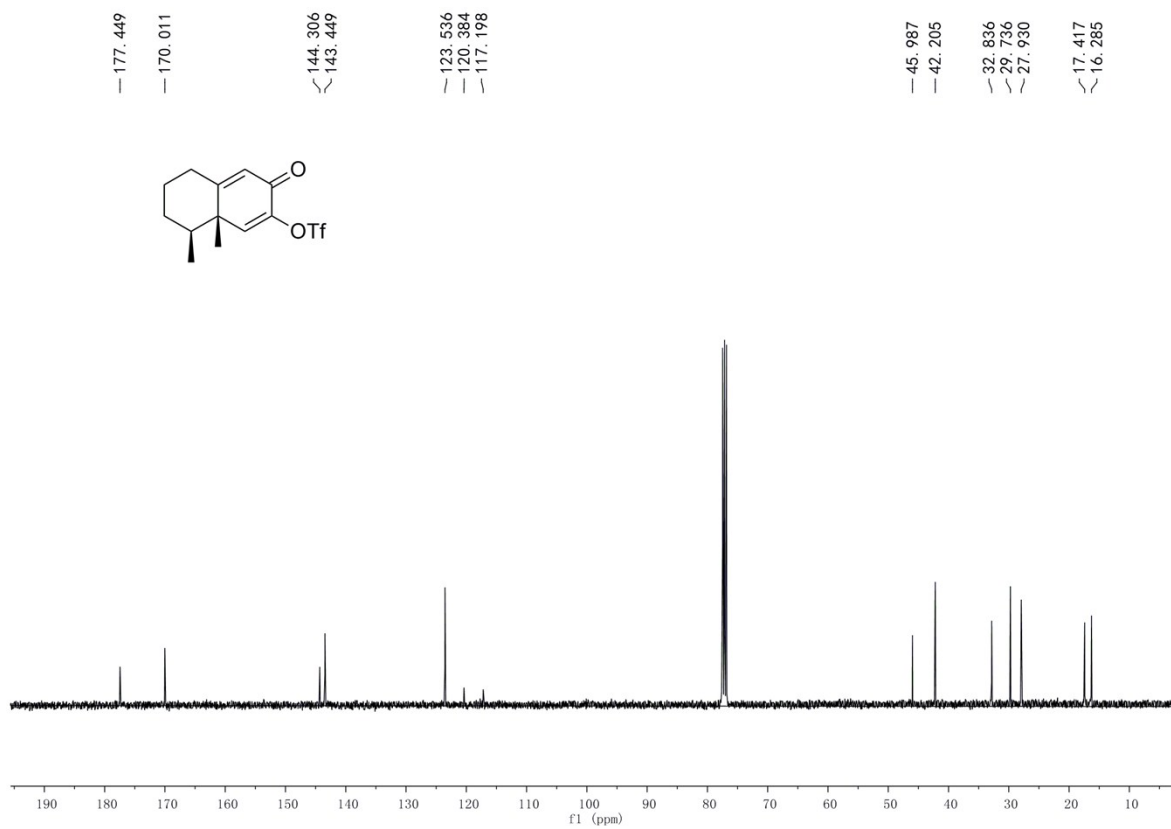

$^1\text{H}$  and  $^{13}\text{C}$  NMR spectra of compound **B**

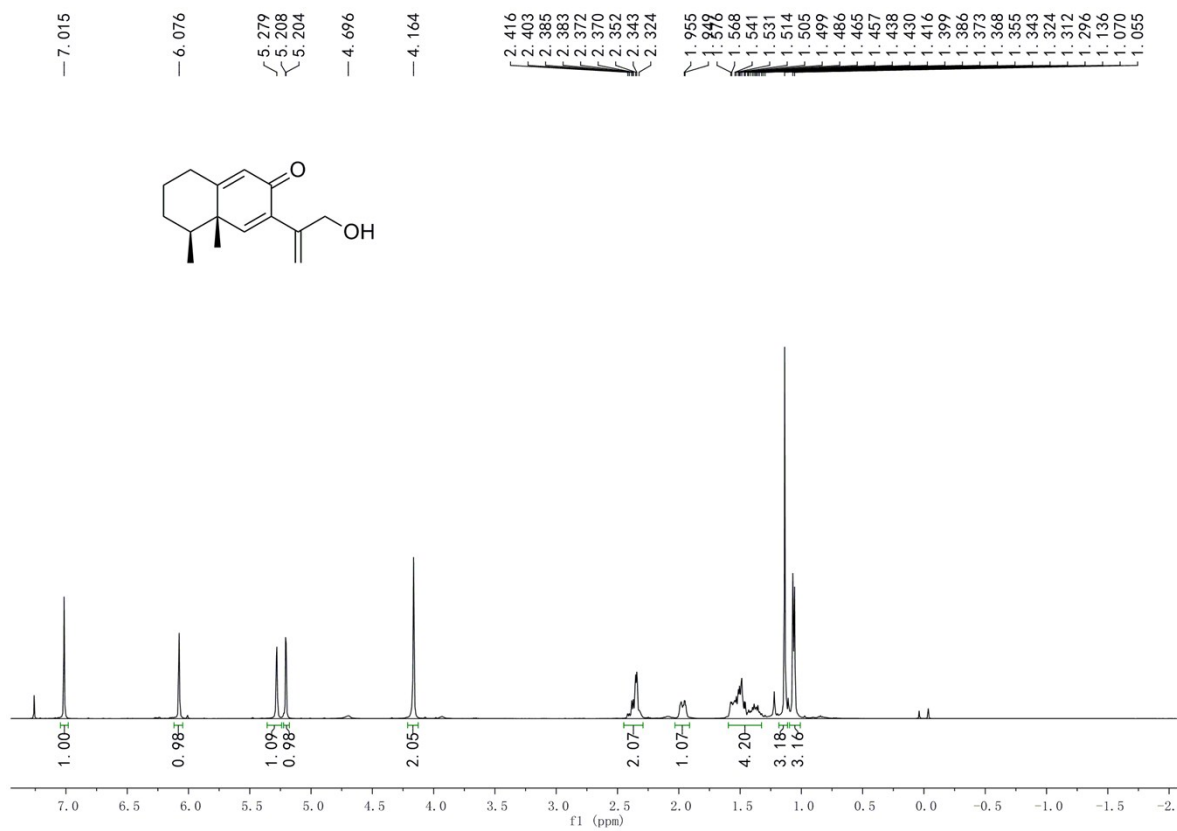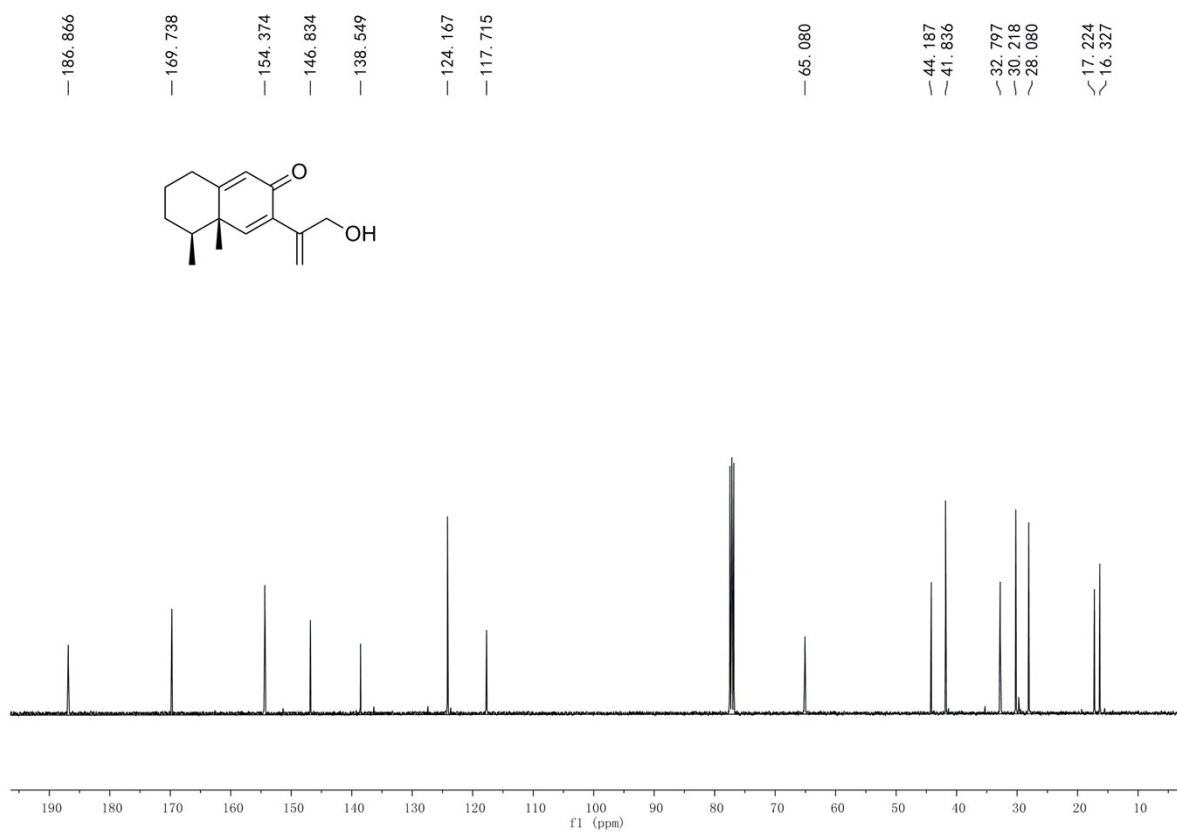



$^1\text{H}$  and  $^{13}\text{C}$  NMR spectra of compound **11**

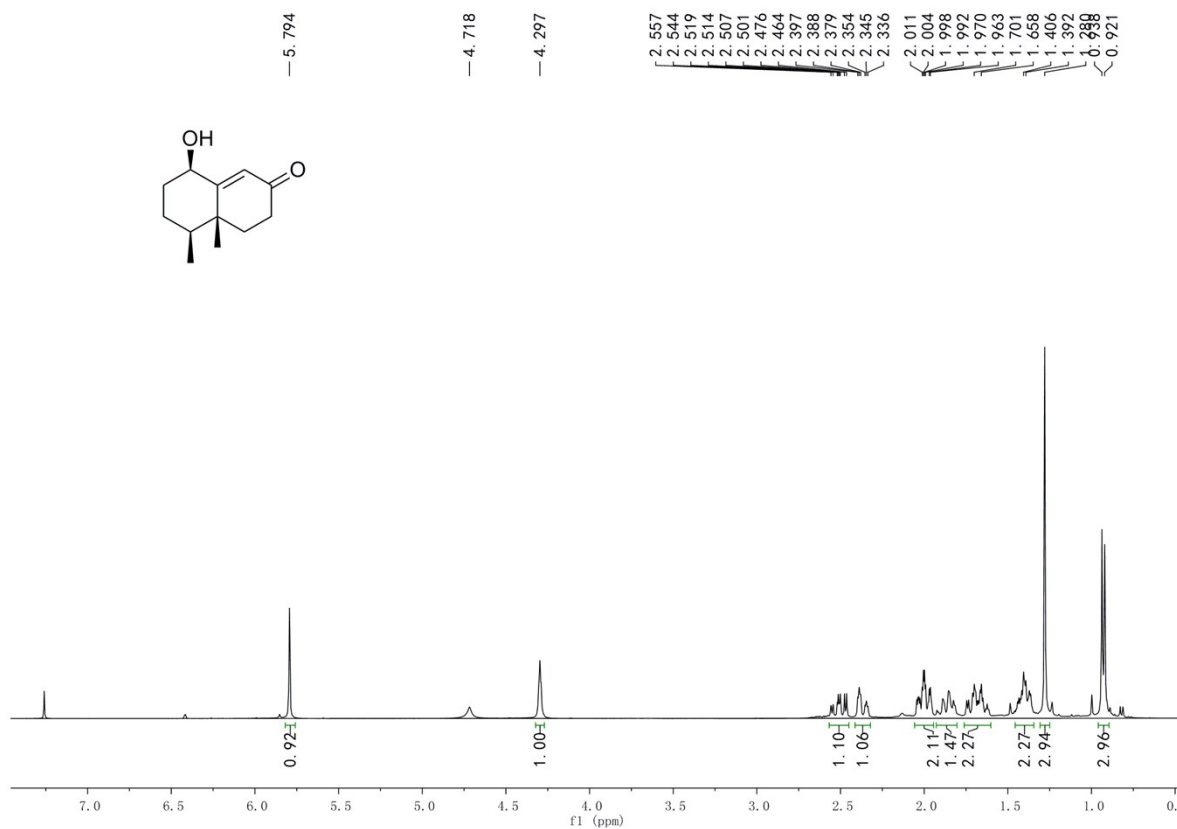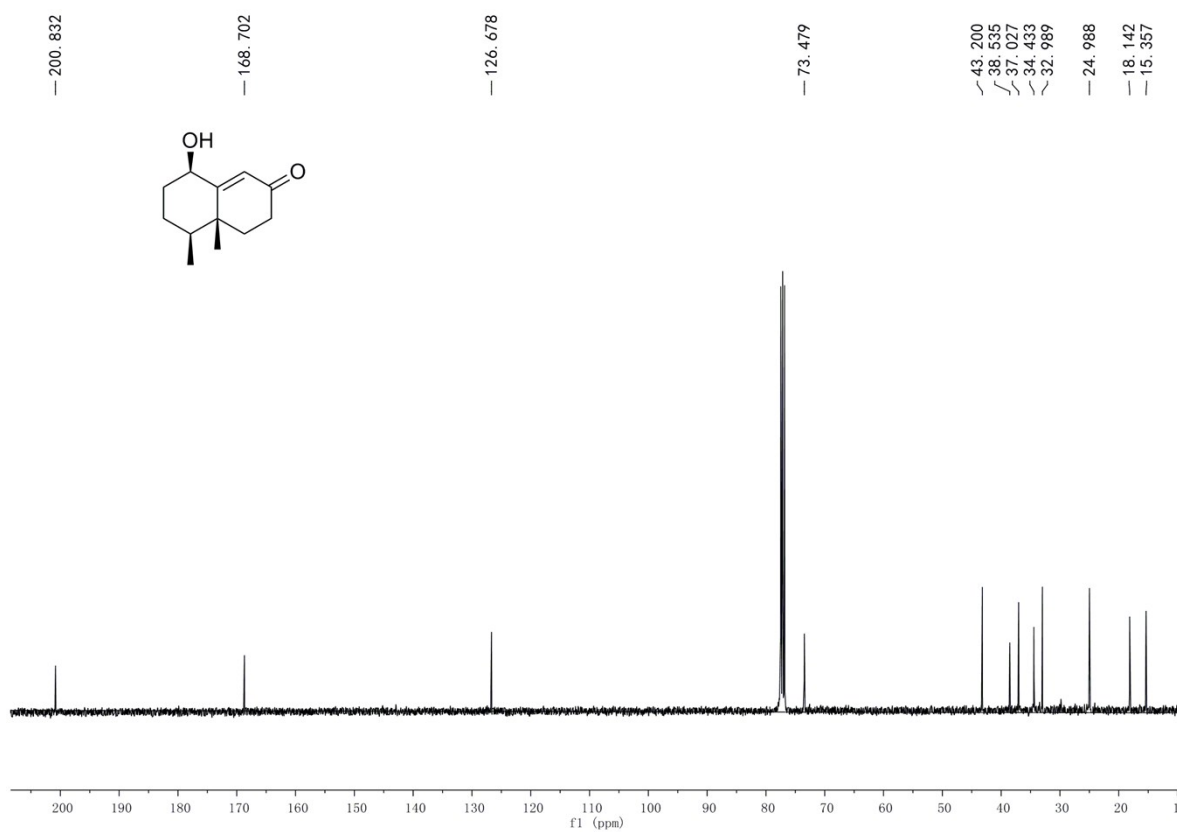

$^1\text{H}$  and  $^{13}\text{C}$  NMR spectra of compound **12**

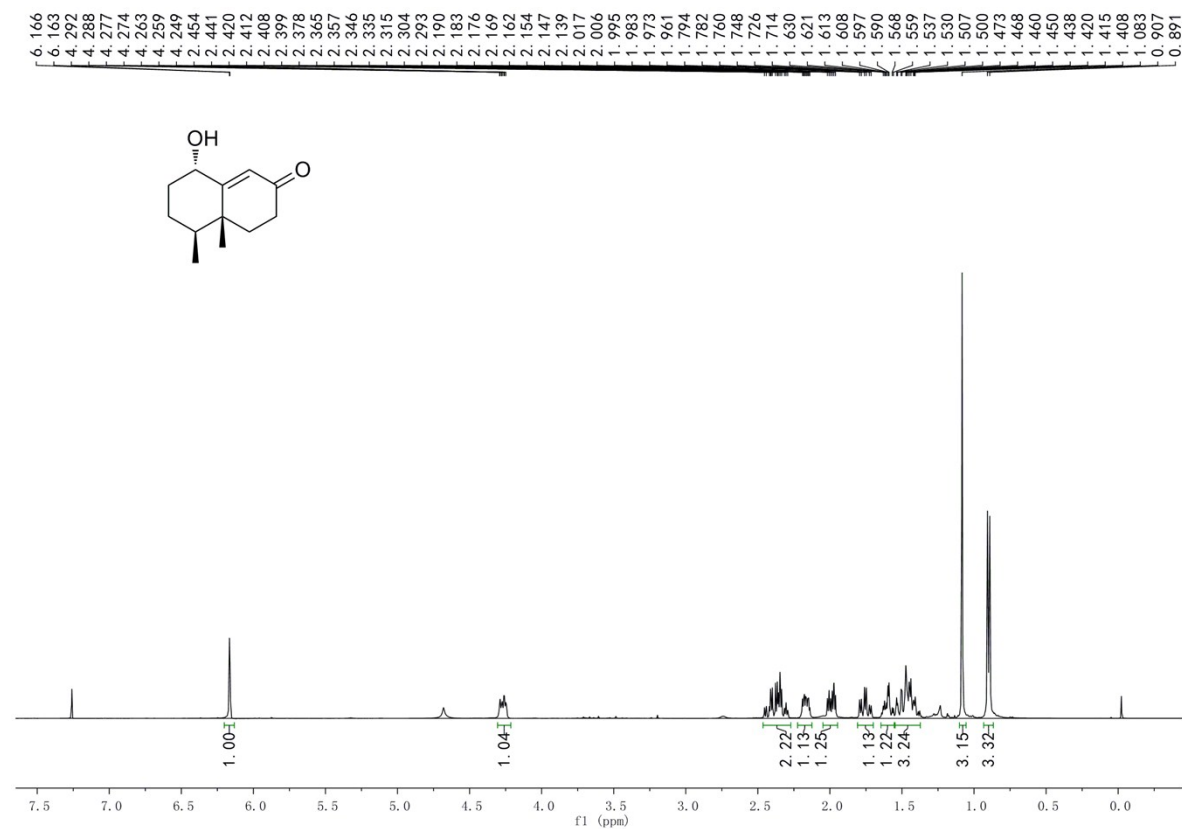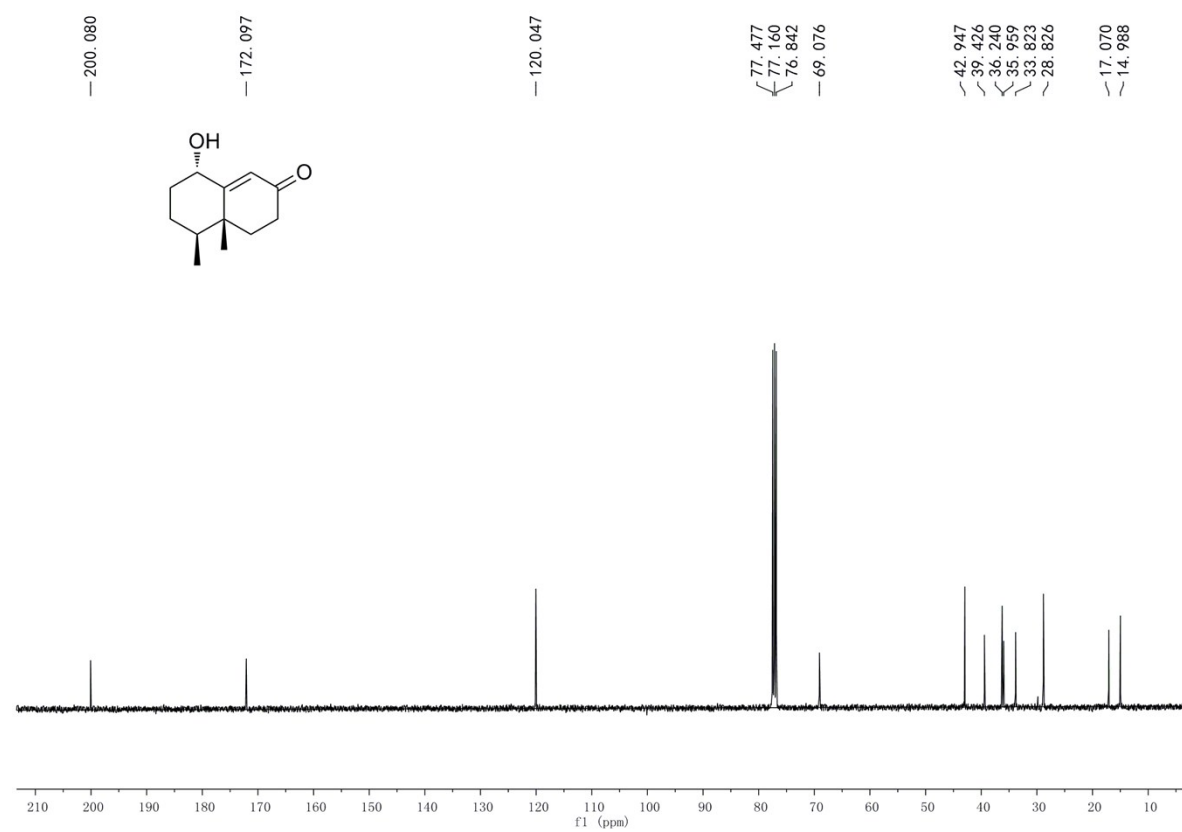

$^1\text{H}$  and  $^{13}\text{C}$  NMR spectra of compound **10**

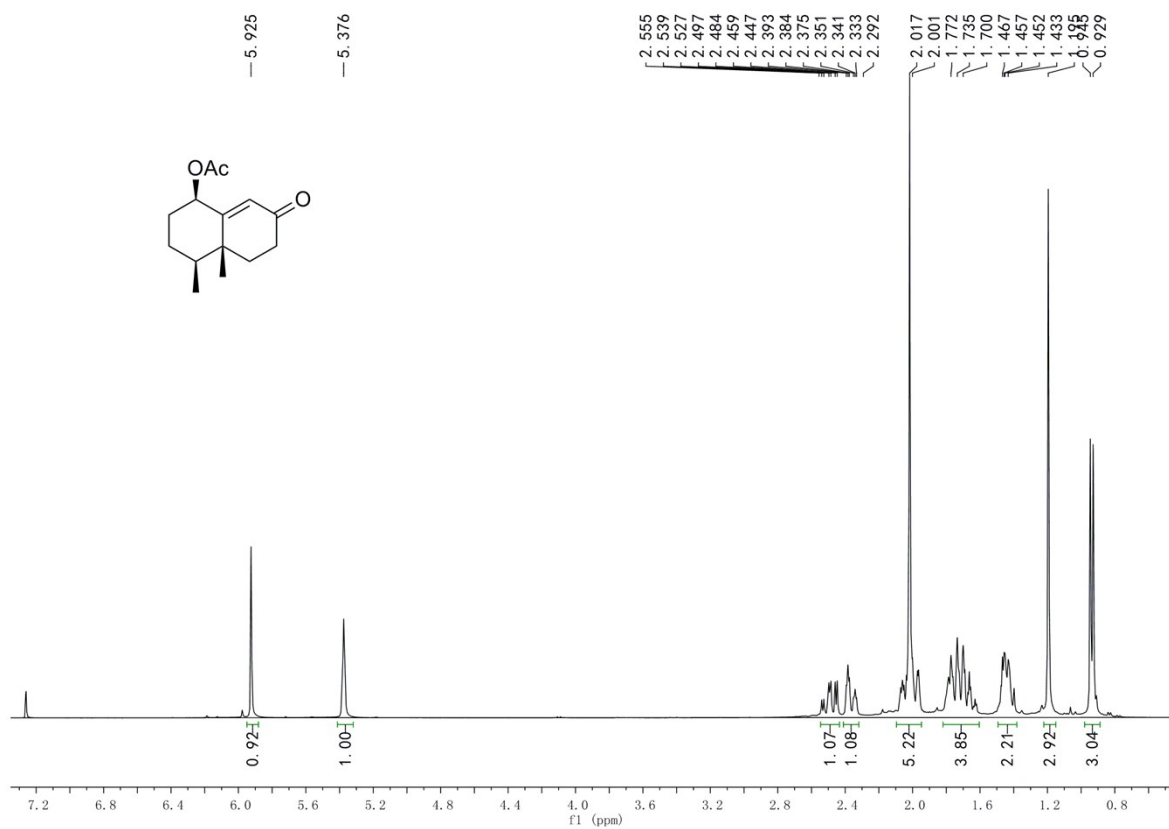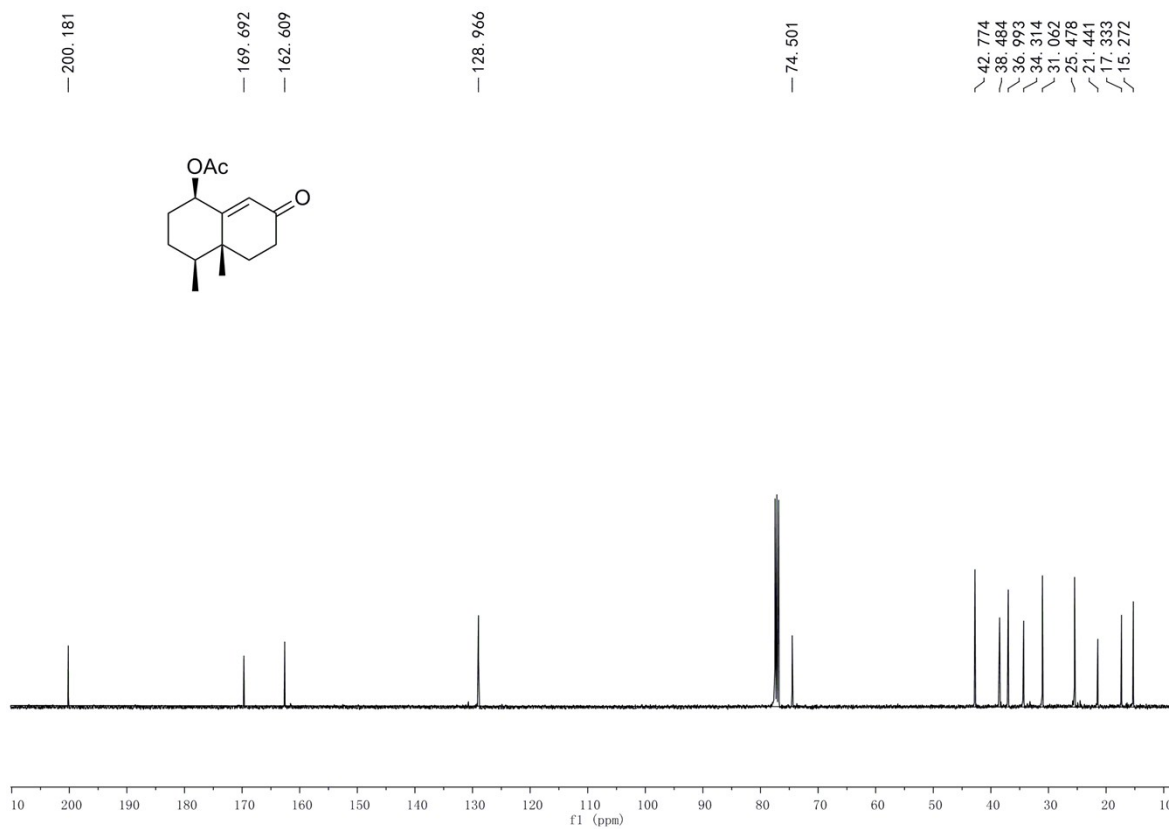

<sup>1</sup>H and <sup>13</sup>C NMR spectra of compound 9

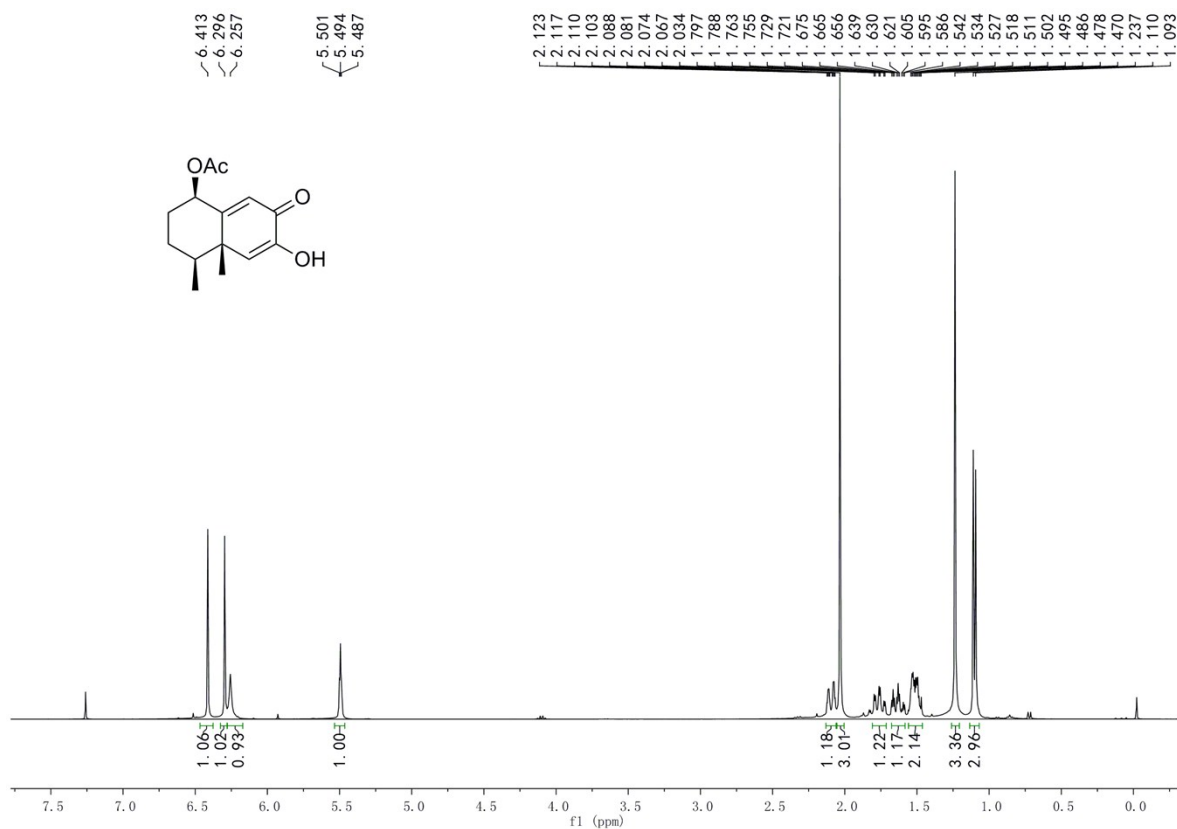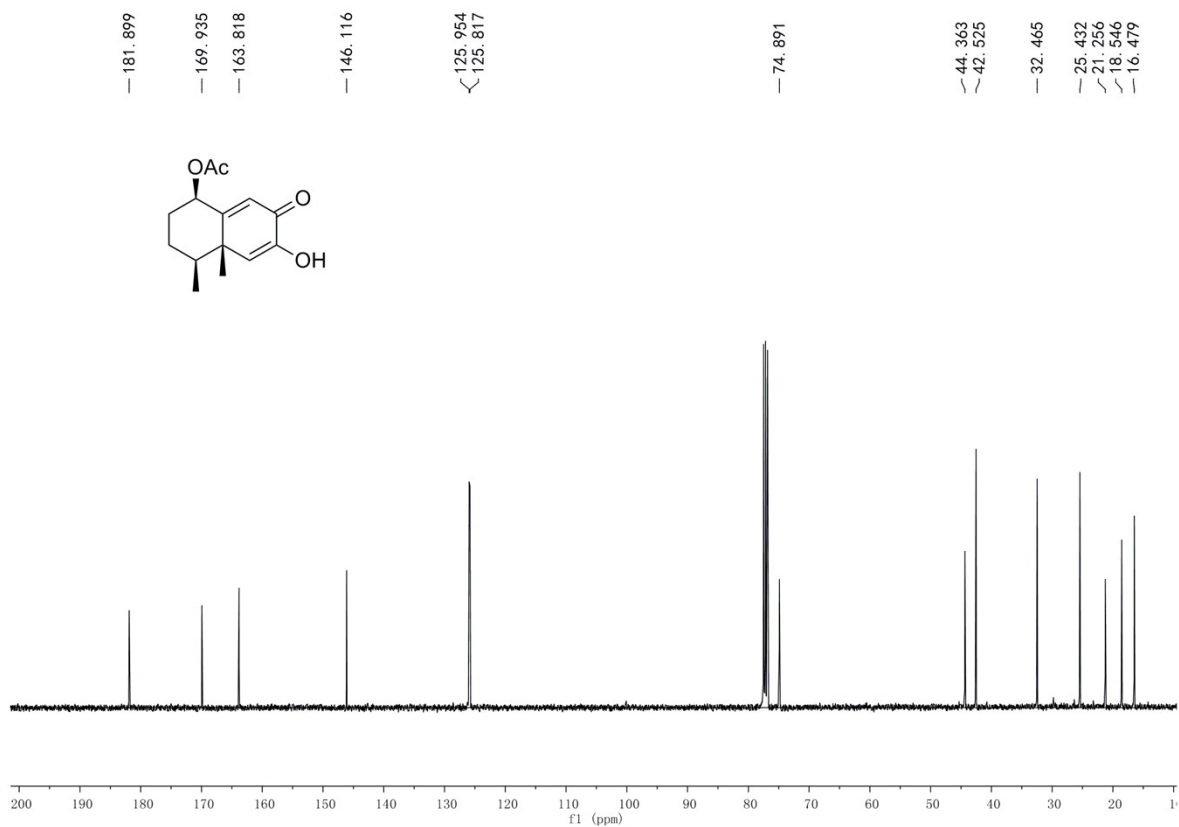

$^1\text{H}$  and  $^{13}\text{C}$  NMR spectra of compound C

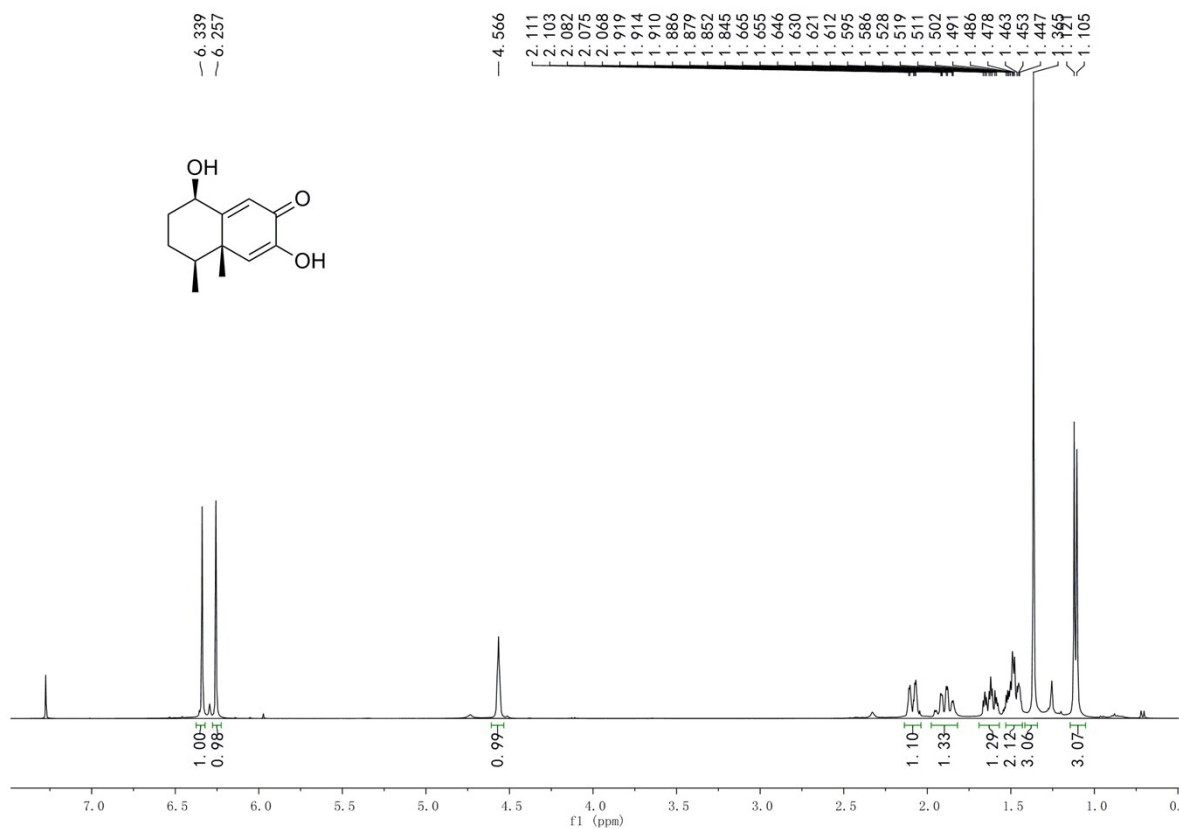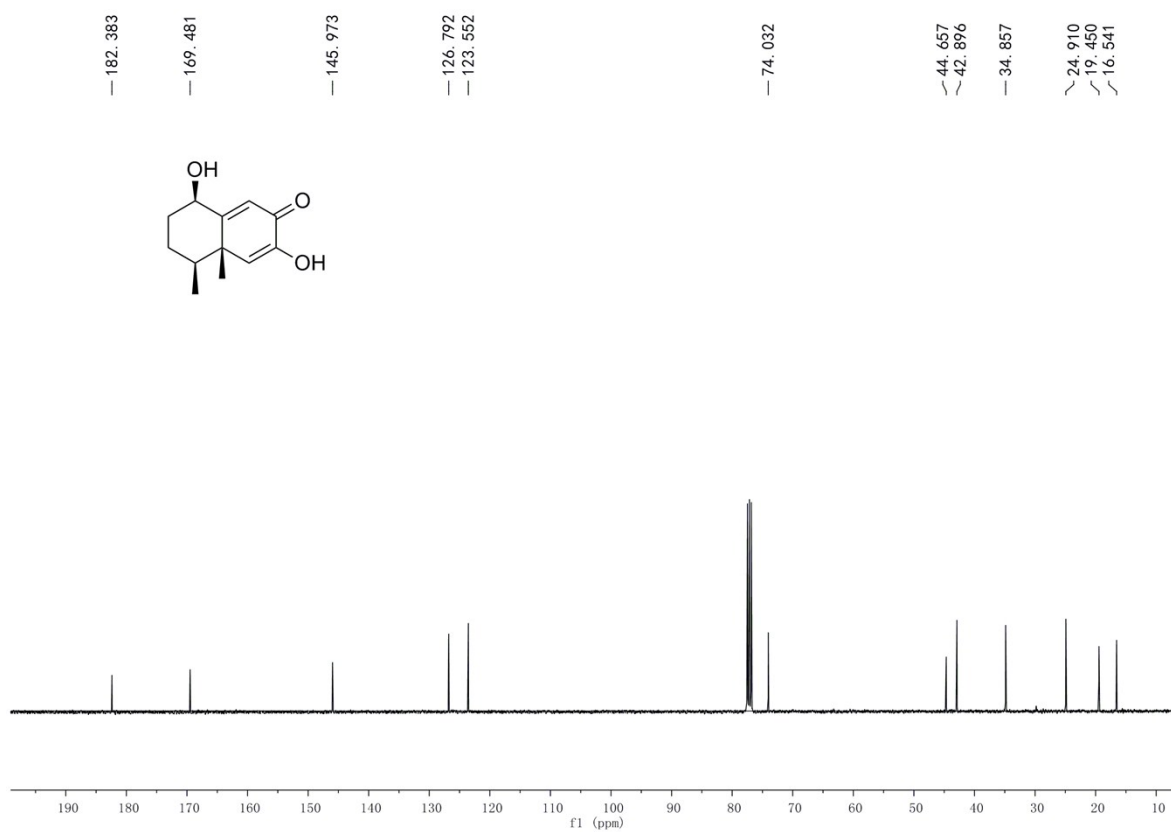

$^1\text{H}$  and  $^{13}\text{C}$  NMR spectra of compound **8**

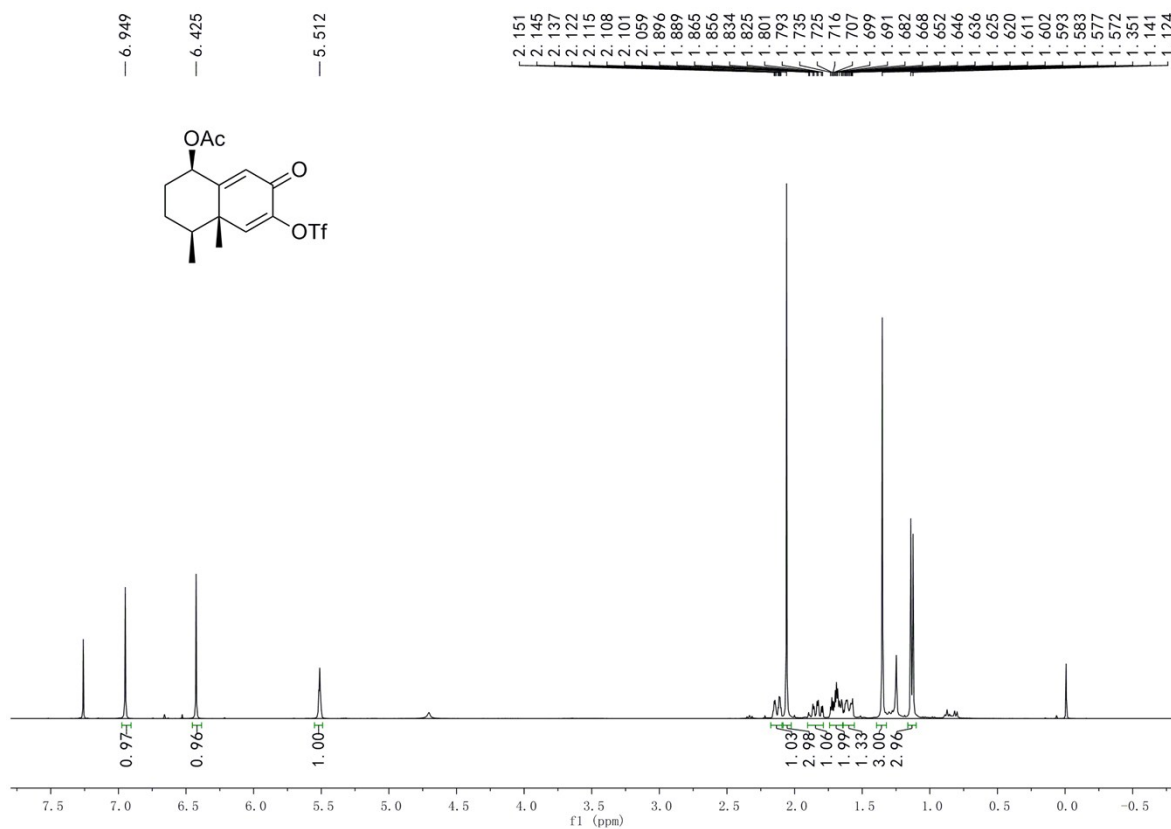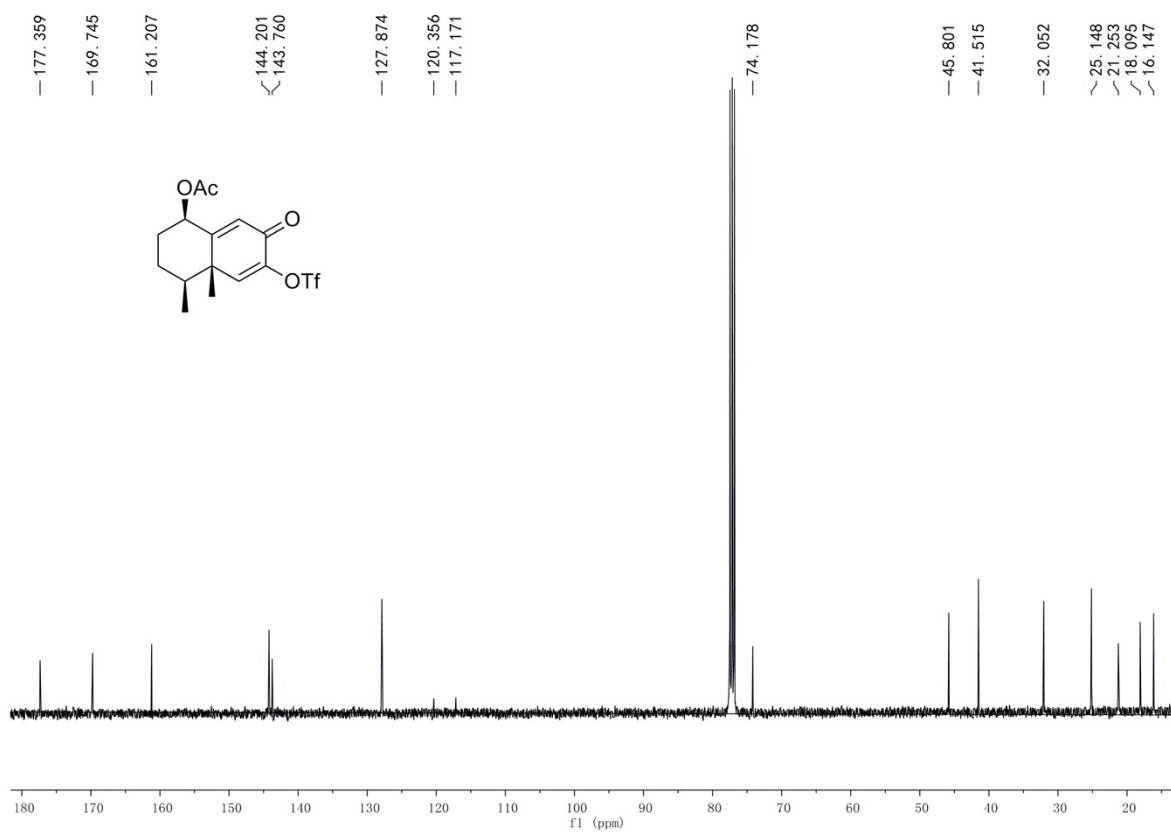

$^1\text{H}$  and  $^{13}\text{C}$  NMR spectra of compound 7

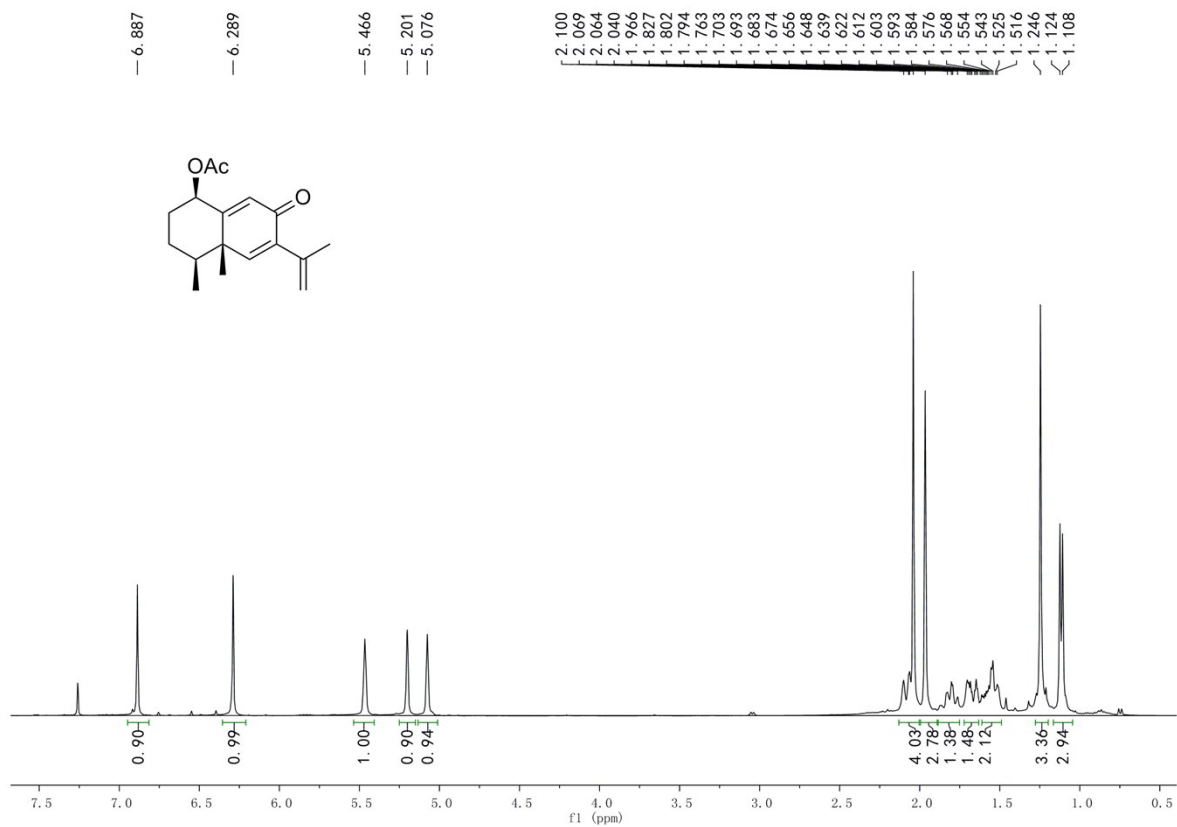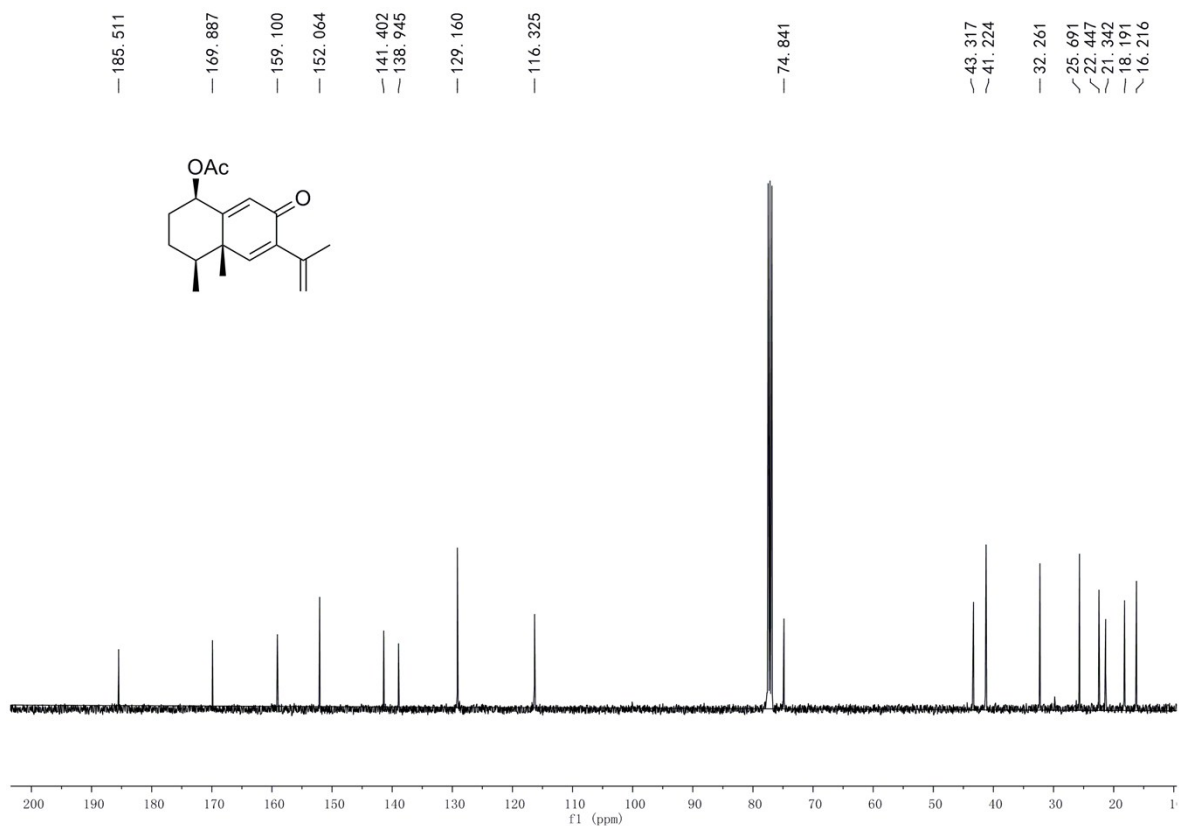

$^1\text{H}$  and  $^{13}\text{C}$  NMR spectra of compound D

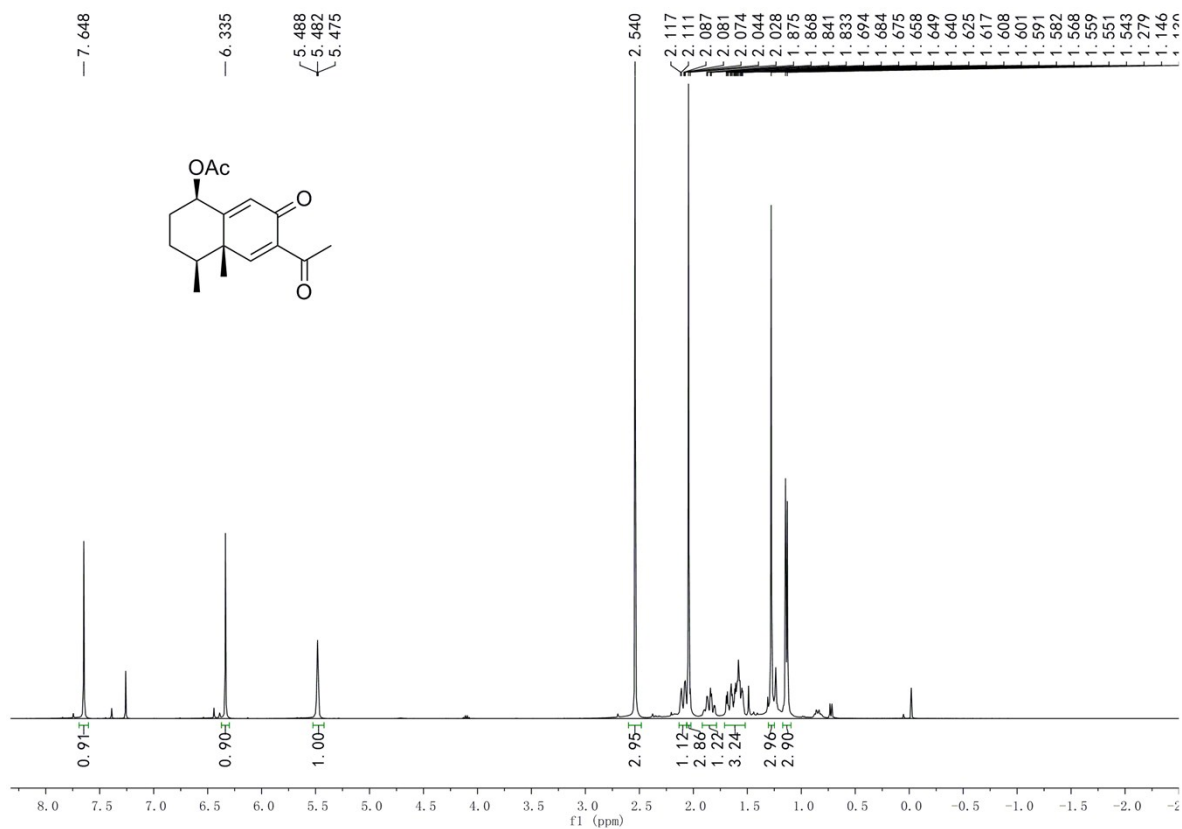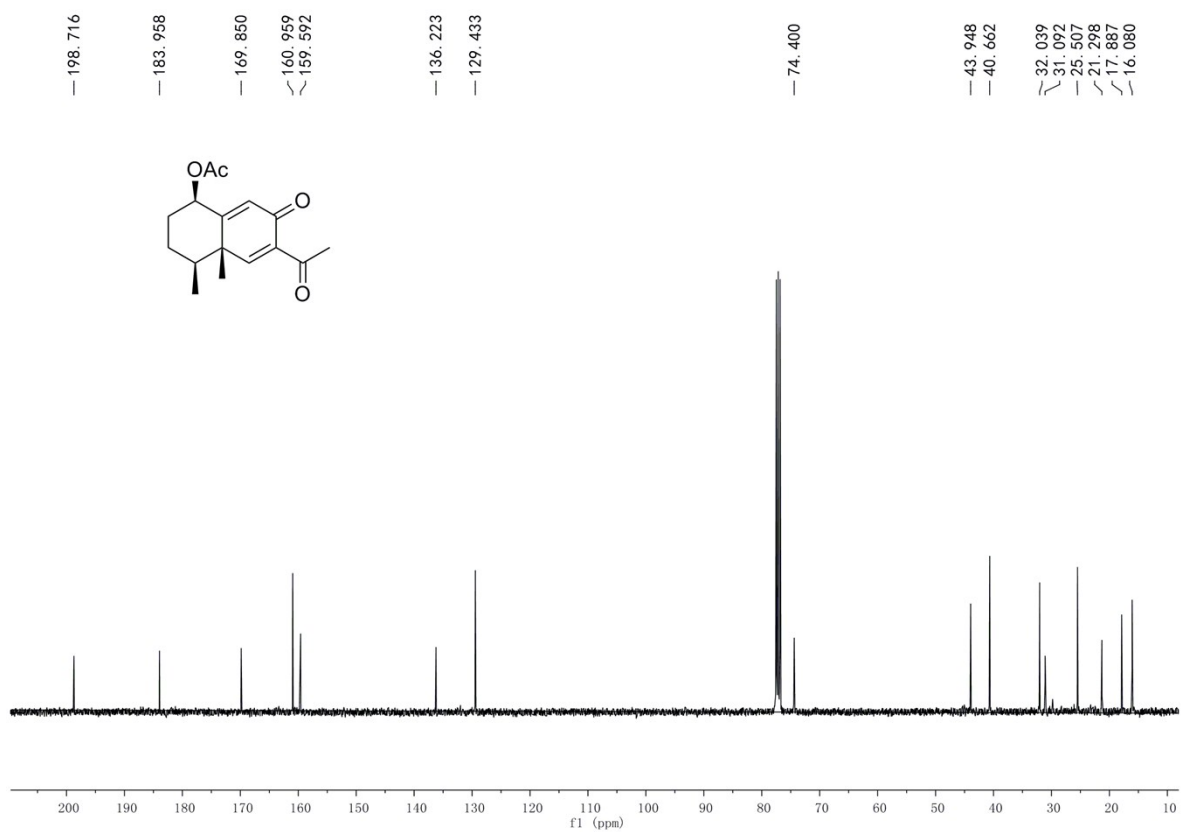



$^1\text{H}$  and  $^{13}\text{C}$  NMR spectra of compound E

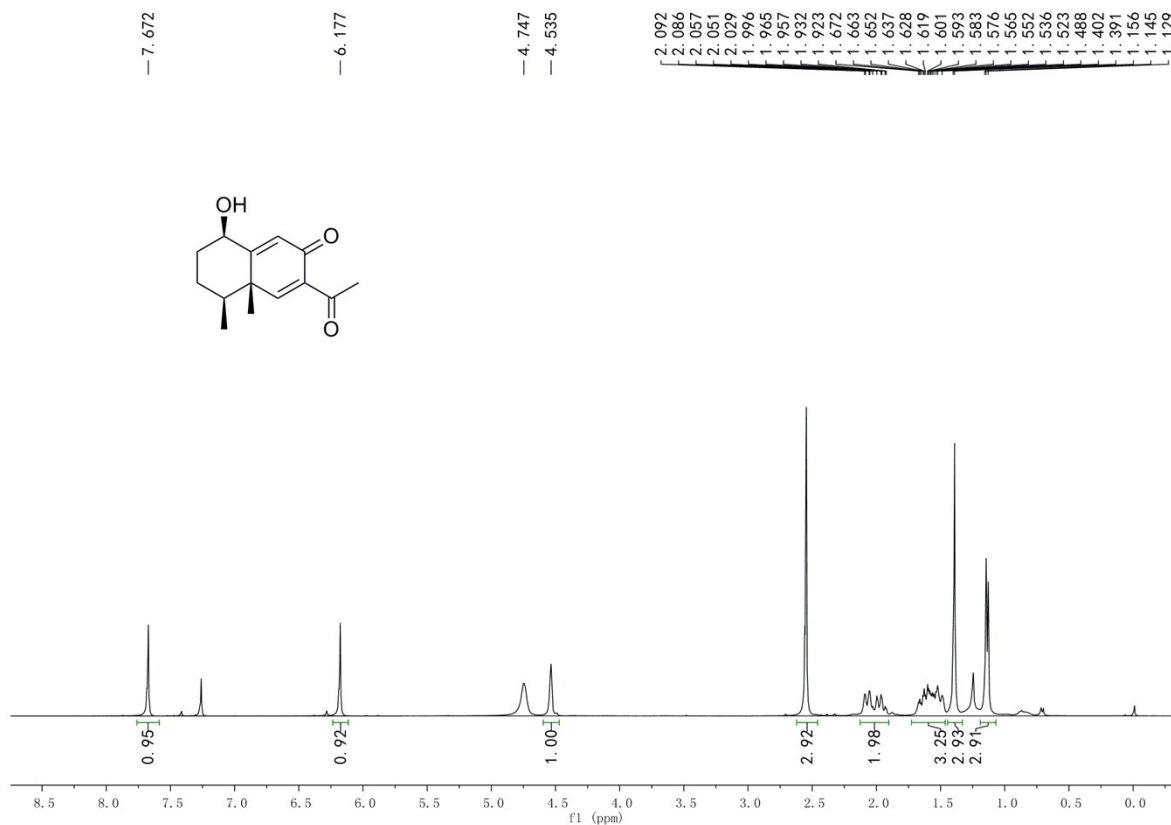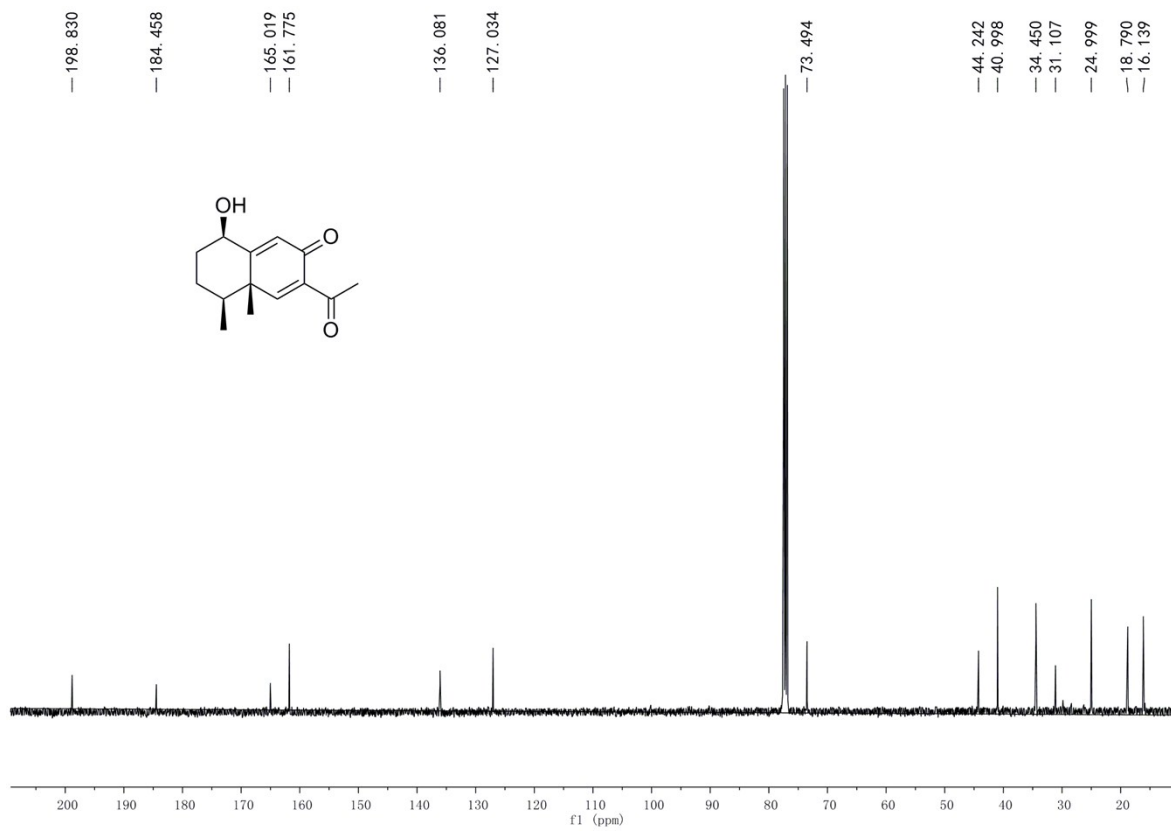

## X-Ray Crystallographic Data for compound A

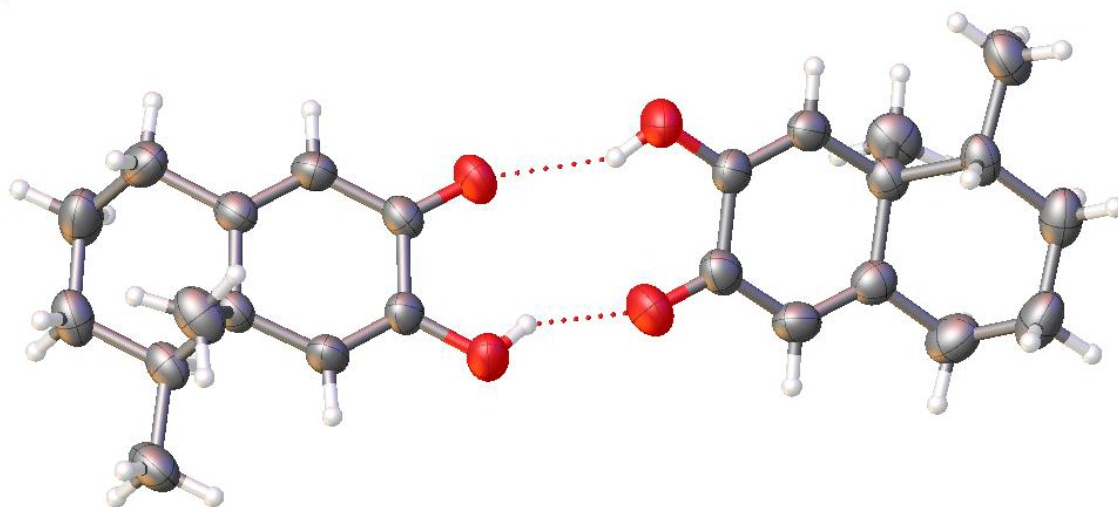

Structure deposited at the Cambridge Crystallographic Data Centre (CCDC 1578461).

### Crystal data and structure refinement for CCDC 1578461

|                                      |                                                               |
|--------------------------------------|---------------------------------------------------------------|
| Empirical formula                    | C <sub>12</sub> H <sub>16</sub> O <sub>2</sub>                |
| Formula weight                       | 192.25                                                        |
| Temperature/K                        | 293.15                                                        |
| Crystal system                       | monoclinic                                                    |
| Space group                          | P2 <sub>1</sub> /c                                            |
| a/Å                                  | 15.4159(7)                                                    |
| b/Å                                  | 16.6808(9)                                                    |
| c/Å                                  | 17.3970(6)                                                    |
| α/°                                  | 90                                                            |
| β/°                                  | 106.212(4)                                                    |
| γ/°                                  | 90                                                            |
| Volume/Å <sup>3</sup>                | 4295.8(3)                                                     |
| Z                                    | 16                                                            |
| ρ <sub>calc</sub> /g/cm <sup>3</sup> | 1.189                                                         |
| μ/mm <sup>-1</sup>                   | 0.079                                                         |
| F(000)                               | 1664.0                                                        |
| Crystal size/mm <sup>3</sup>         | 0.3 × 0.25 × 0.2                                              |
| Radiation                            | MoKα (λ = 0.71073)                                            |
| 2θ range for data collection/°       | 5.892 to 52.744                                               |
| Index ranges                         | -16 ≤ h ≤ 19, -12 ≤ k ≤ 20, -21 ≤ l ≤ 16                      |
| Reflections collected                | 20240                                                         |
| Independent reflections              | 8766 [R <sub>int</sub> = 0.0215, R <sub>sigma</sub> = 0.0398] |
| Data/restraints/parameters           | 8766/0/517                                                    |

|                                                |                                  |
|------------------------------------------------|----------------------------------|
| Goodness-of-fit on $F^2$                       | 1.016                            |
| Final R indexes [ $I \geq 2\sigma(I)$ ]        | $R_1 = 0.0493$ , $wR_2 = 0.1170$ |
| Final R indexes [all data]                     | $R_1 = 0.0909$ , $wR_2 = 0.1397$ |
| Largest diff. peak/hole / $e \text{ \AA}^{-3}$ | 0.16/-0.16                       |

## X-Ray Crystallographic Data for compound C

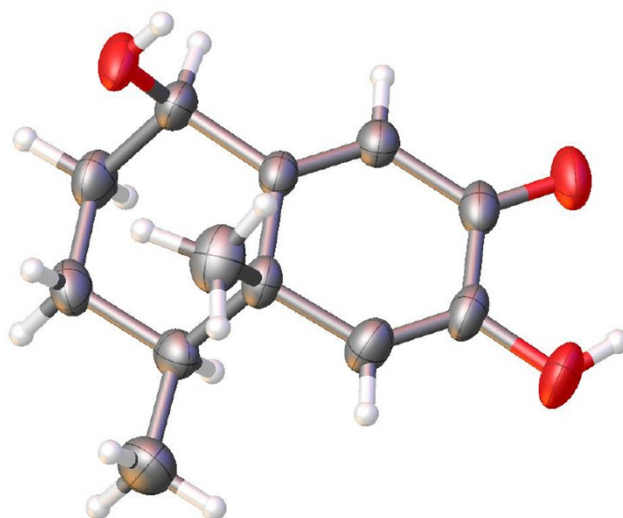

Structure deposited at the Cambridge Crystallographic Data Centre (CCDC 1578462).

### Crystal data and structure refinement for CCDC 1578462

|                                      |                                                               |
|--------------------------------------|---------------------------------------------------------------|
| Empirical formula                    | C <sub>12</sub> H <sub>16</sub> O <sub>3</sub>                |
| Formula weight                       | 208.25                                                        |
| Temperature/K                        | 293.15                                                        |
| Crystal system                       | triclinic                                                     |
| Space group                          | P-1                                                           |
| a/Å                                  | 7.3633(6)                                                     |
| b/Å                                  | 8.6583(8)                                                     |
| c/Å                                  | 9.2145(9)                                                     |
| α/°                                  | 95.128(8)                                                     |
| β/°                                  | 98.931(8)                                                     |
| γ/°                                  | 111.272(8)                                                    |
| Volume/Å <sup>3</sup>                | 533.98(9)                                                     |
| Z                                    | 2                                                             |
| ρ <sub>calc</sub> /g/cm <sup>3</sup> | 1.295                                                         |
| μ/mm <sup>-1</sup>                   | 0.092                                                         |
| F(000)                               | 224.0                                                         |
| Crystal size/mm <sup>3</sup>         | 0.35 × 0.3 × 0.3                                              |
| Radiation                            | MoKα (λ = 0.71073)                                            |
| 2θ range for data collection/°       | 6.062 to 52.74                                                |
| Index ranges                         | -9 ≤ h ≤ 8, -10 ≤ k ≤ 10, -11 ≤ l ≤ 11                        |
| Reflections collected                | 4508                                                          |
| Independent reflections              | 2184 [R <sub>int</sub> = 0.0157, R <sub>sigma</sub> = 0.0290] |
| Data/restraints/parameters           | 2184/0/143                                                    |

Goodness-of-fit on  $F^2$  1.034  
Final R indexes [ $I \geq 2\sigma(I)$ ]  $R_1 = 0.0455$ ,  $wR_2 = 0.1011$   
Final R indexes [all data]  $R_1 = 0.0637$ ,  $wR_2 = 0.1131$   
Largest diff. peak/hole /  $e \text{ \AA}^{-3}$  0.21/-0.16

## X-Ray Crystallographic Data for compound E

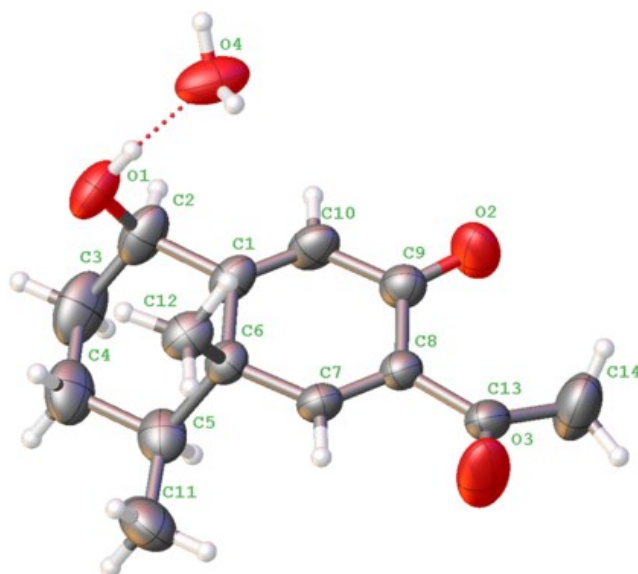

Structure deposited at the Cambridge Crystallographic Data Centre (CCDC 1585496).

### Crystal data and structure refinement for CCDC 1585496

|                                    |                                                |
|------------------------------------|------------------------------------------------|
| Empirical formula                  | C <sub>14</sub> H <sub>20</sub> O <sub>4</sub> |
| Formula weight                     | 252.30                                         |
| Temperature/K                      | 293.15                                         |
| Crystal system                     | monoclinic                                     |
| Space group                        | P2 <sub>1</sub> /c                             |
| a/Å                                | 15.0329(6)                                     |
| b/Å                                | 7.9949(3)                                      |
| c/Å                                | 11.4441(6)                                     |
| α /°                               | 90                                             |
| β /°                               | 97.344(4)                                      |
| γ /°                               | 90                                             |
| Volume/Å <sup>3</sup>              | 1364.15(11)                                    |
| Z                                  | 4                                              |
| ρ <sub>calc</sub> /cm <sup>3</sup> | 1.228                                          |
| μ /mm <sup>-1</sup>                | 0.089                                          |
| F(000)                             | 544.0                                          |
| Crystal size/mm <sup>3</sup>       | 0.35 × 0.3 × 0.25                              |
| Radiation                          | MoKα (λ = 0.71073)                             |
| 2θ range for data collection/°     | 6.234 to 52.744                                |
| Index ranges                       | -18 ≤ h ≤ 17, -9 ≤ k ≤ 9,<br>-14 ≤ l ≤ 8       |

|                                                |                                                                  |
|------------------------------------------------|------------------------------------------------------------------|
| Reflections collected                          | 5658                                                             |
| Independent reflections                        | 2778 [ $R_{\text{int}} = 0.0159$ , $R_{\text{sigma}} = 0.0297$ ] |
| Data/restraints/parameters                     | 2778/0/189                                                       |
| Goodness-of-fit on $F^2$                       | 1.038                                                            |
| Final R indexes [ $I \geq 2\sigma$ (I)]        | $R_1 = 0.0487$ , $wR_2 = 0.1132$                                 |
| Final R indexes [all data]                     | $R_1 = 0.0746$ , $wR_2 = 0.1303$                                 |
| Largest diff. peak/hole / $e \text{ \AA}^{-3}$ | 0.15/-0.16                                                       |
